# Supplementary material
Source: PubMed Central journal article supplement (PMC6934413)
Supplement: EMS85281-supplement-Supplemental_information.pdf [file EMS85281-supplement-Supplemental_information.pdf]

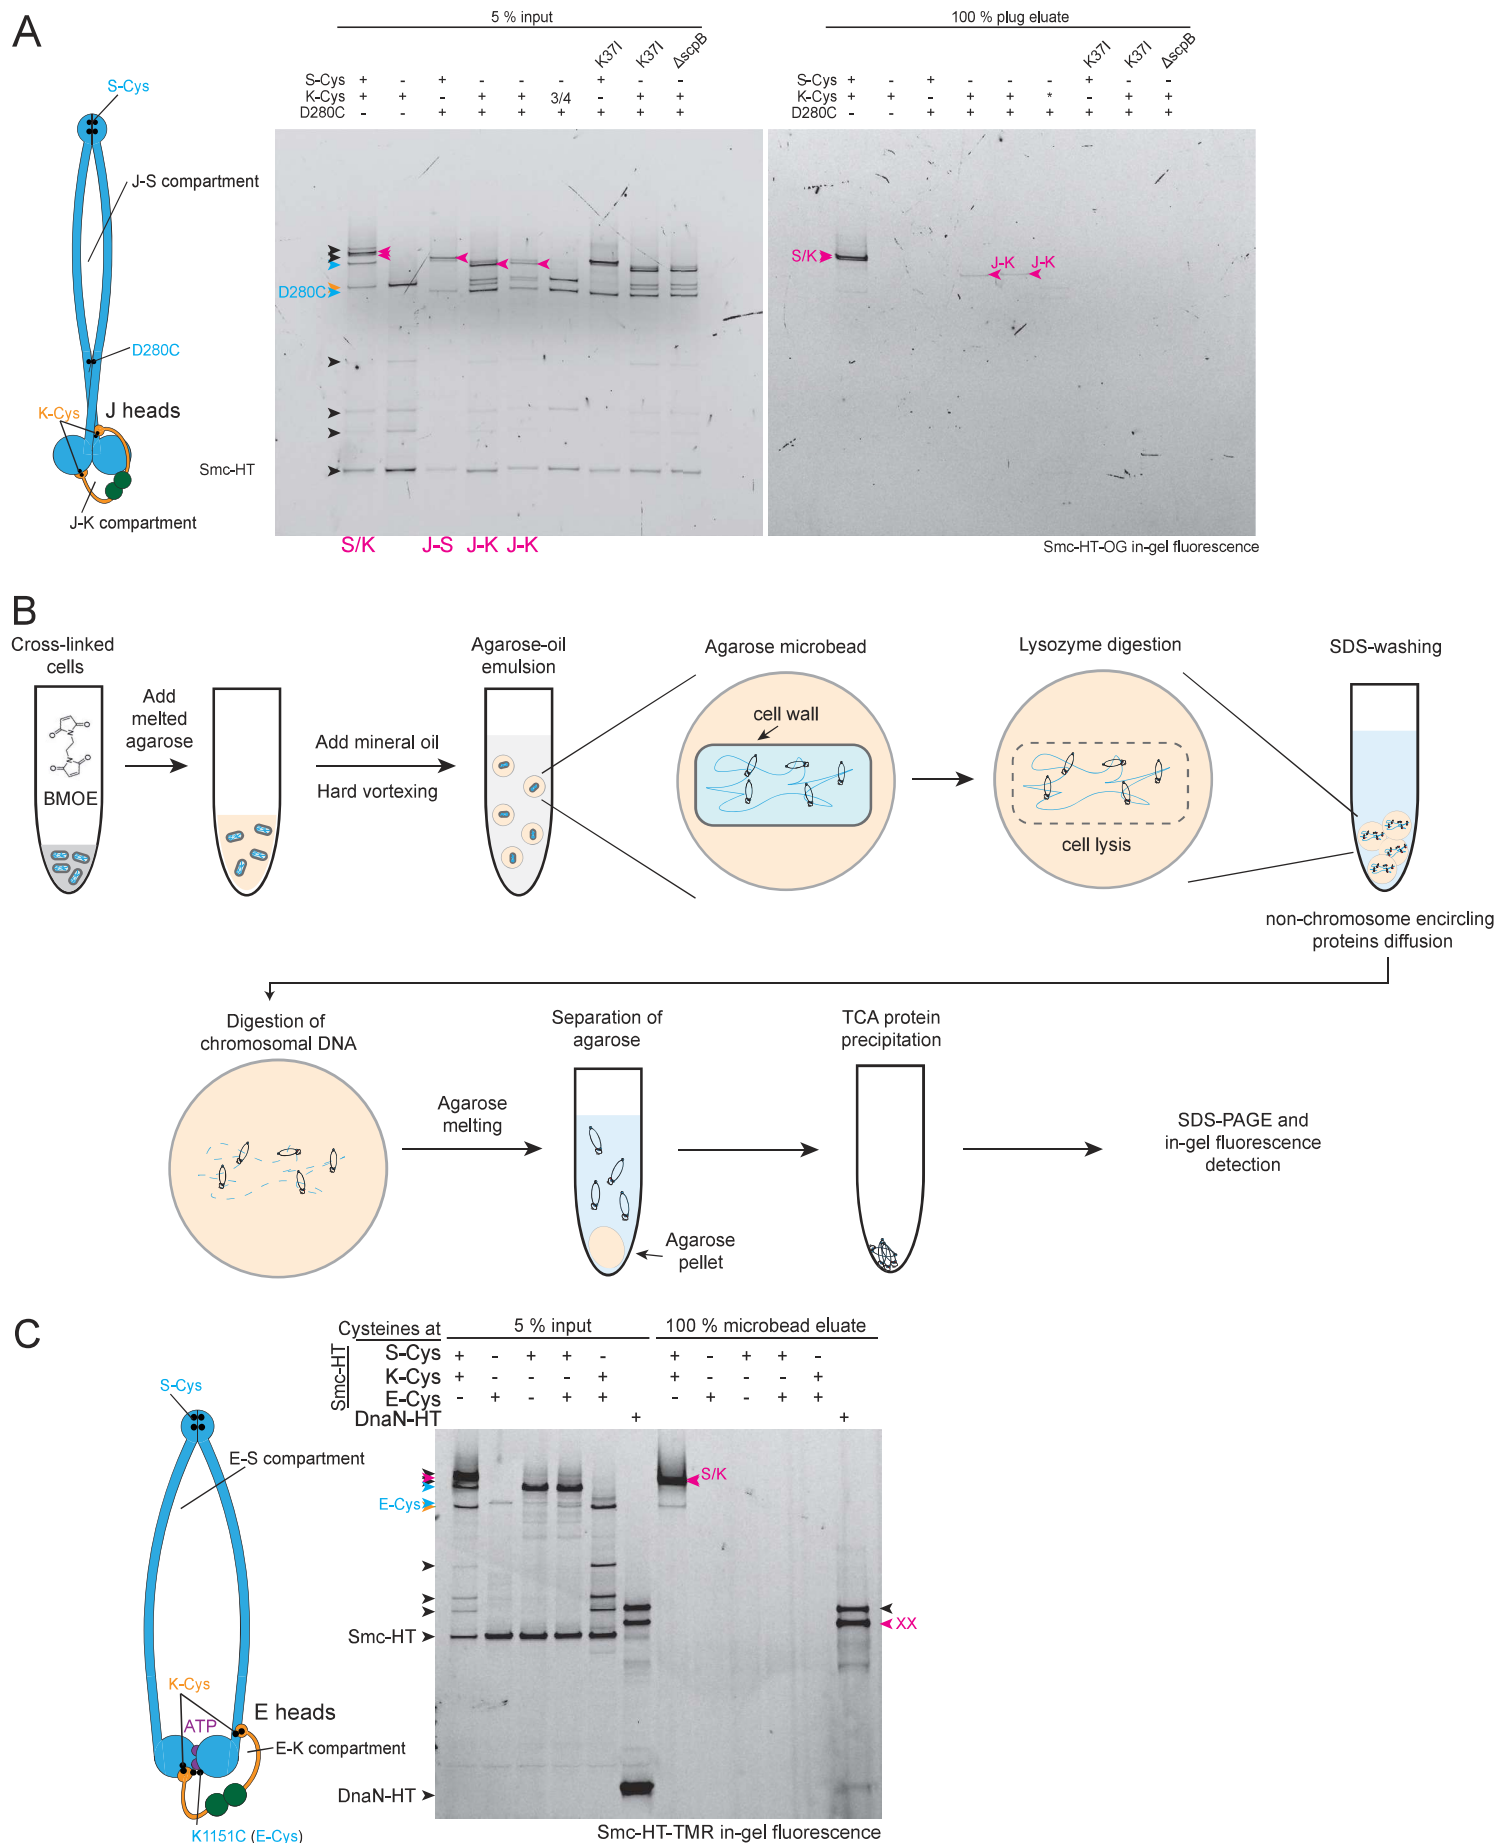

Figure S1

**Figure S1, related to Figure 1.**

(A) Chromosome entrapment assay using agarose plugs (as in Figure 1C) for strains harboring the Smc arm cross-linking residue D280C. Strains in lane 4 and 5 are identical except for mutations in the HaloTag and cysteine-free Smc (lane 5). Strain in lane 6 harbors only three out of four cysteines for K-Cys cross-linking and thus cannot produce circular species. Labelling of bands as in Figure 1B-D.

(B) Scheme of the optimized chromosome entrapment assay using agarose microbeads instead of agarose plugs. Cells are incubated with BMOE and rapidly mixed with molten agarose solution and with mineral oil. An emulsion is formed by continuous vortexing until the agarose forms gel microbeads. The oil is removed and the cells in the agarose microbeads are labelled with HaloTag ligands and lysed. The microbeads are washed in presence of SDS. Proteins retained in the agarose microbeads are released by DNA digestion and precipitated to finally resolve them by SDS-PAGE and in-gel fluorescence detection.

(C) Chromosome entrapment assay with agarose microbeads. As in Figure 1D for E heads Smc/ScpAB instead of J heads Smc/ScpAB. Labelling as in Figure 1D. Species cross-linked by E-Cys (K1151C) ('E') are indicated by an arrowhead in blue colors. Please note that E-Cys cross-linking is inefficient in wt Smc. Species for E-S and E-K compartments are difficult to discern in the input samples and absent from agarose eluates. A mix of cells carrying wt DnaN (80 %), DnaN-HT (10 %) and DnaN(Cys)-HT (10 %) is included as positive and negative control for DNA entrapment. Arrowheads in magenta colors denote circular protein species. 'XX' indicates the double cross-linked, circular DnaN-HT species. The single cross-linked, X-shaped DnaN-HT species exhibits slightly slower mobility (labeled by arrowhead in black colors).

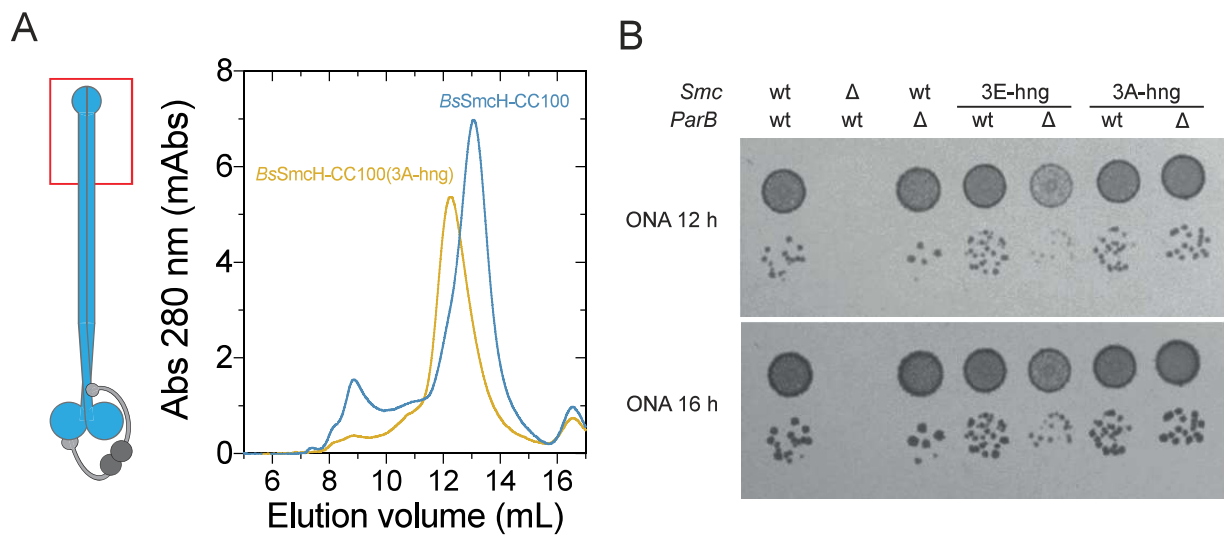

**Figure S2**

**Figure S2, related to Figure 2.**

(A) Size exclusion chromatography of SmcH-CC100 proteins. Gel filtration profile on a Superdex 200 10/300 column. The 3A-hng mutation does not affect dimer formation but appears to increase the fraction of an extended ('open-arm') conformation.

(B) Dilution spotting of *smc(3E-hng)* and *smc(3A-hng)* cells on nutrient-rich medium (ONA) grown for 12 hours (upper panel) or 16 hours (lower panel). The lower panel is identical to the one shown in Figure 2D.

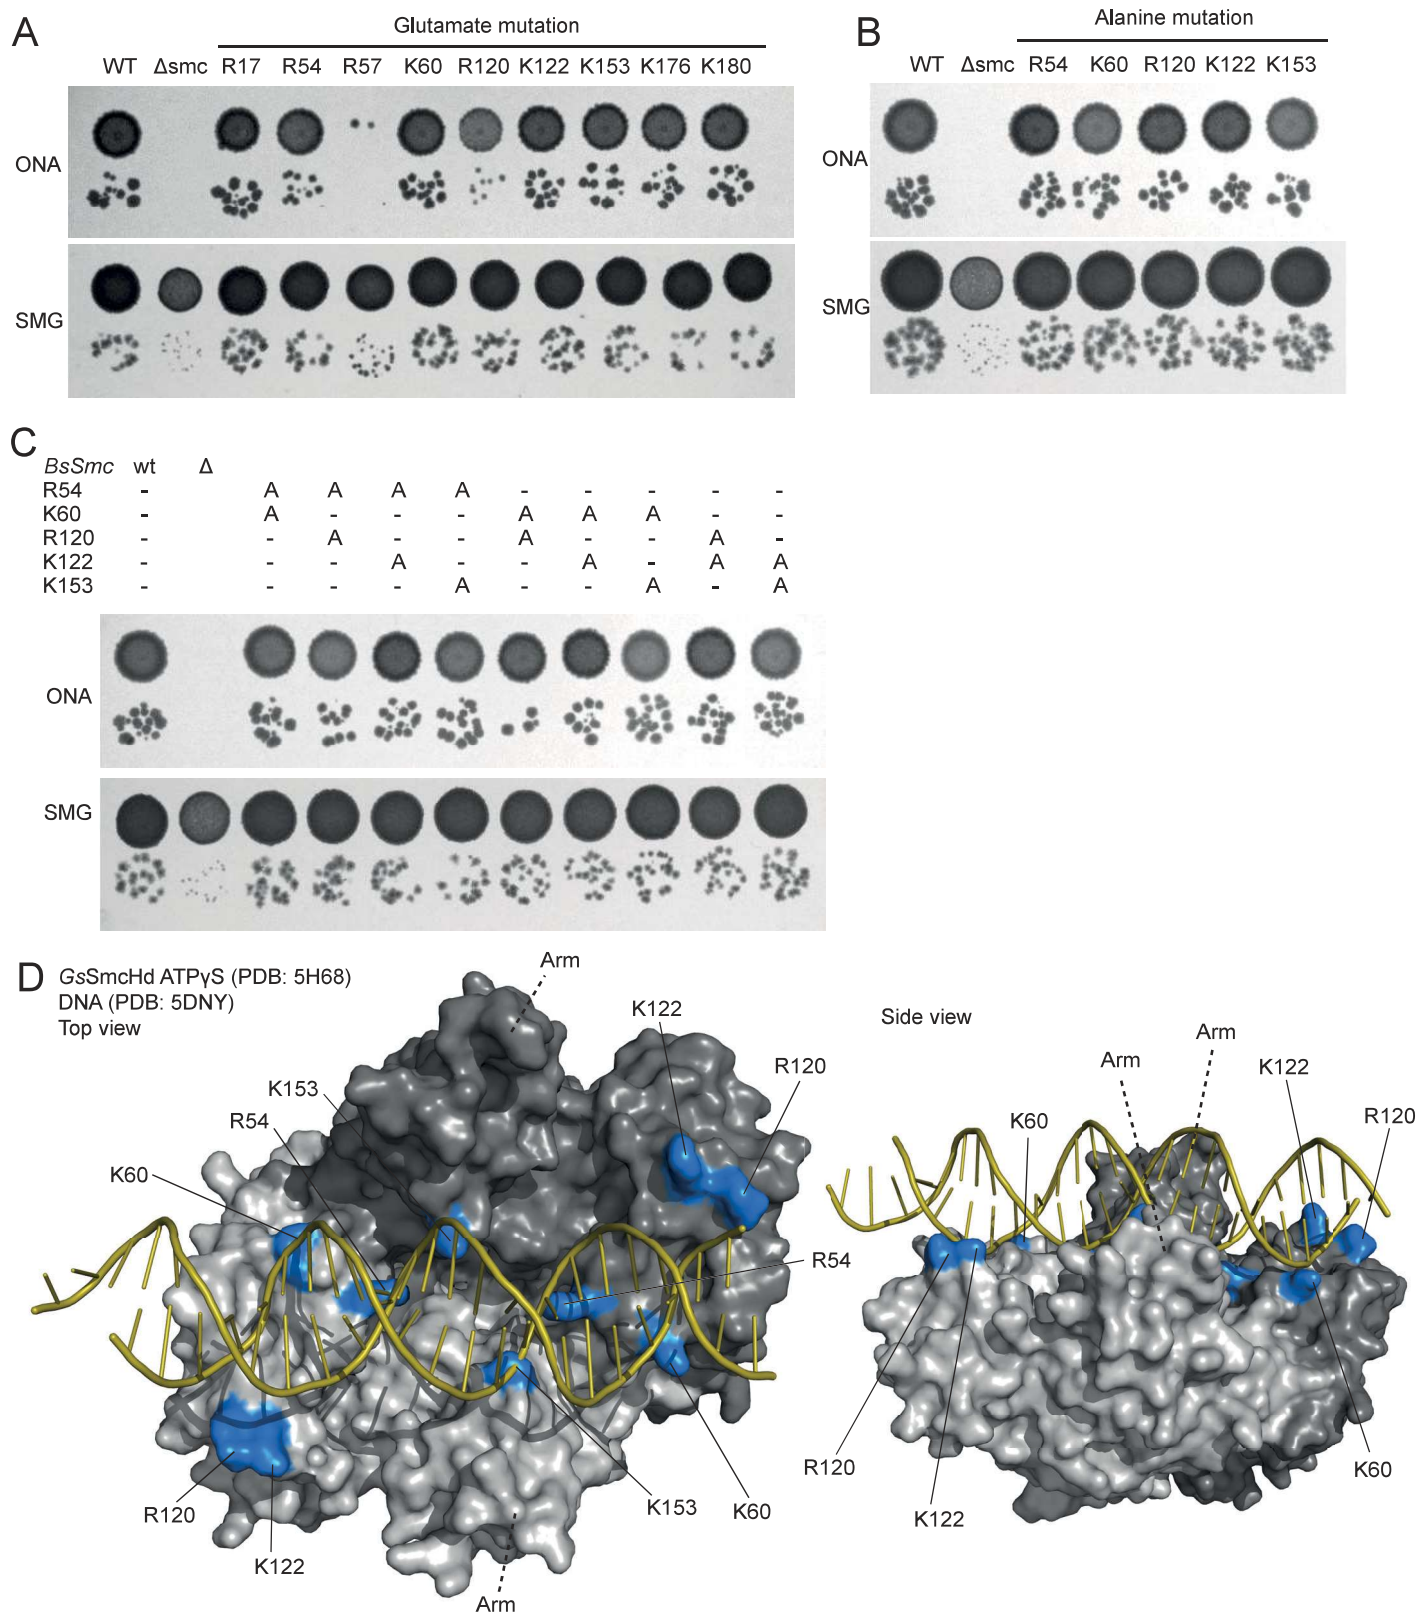

**Figure S3**

**Figure S3, related to Figure 3.**

- (A) Dilution spotting of single glutamate mutants. R57 is buried in E heads Smc and contacts ATP, thus it was not considered to be a DNA binding residue. As in Figure 2B.
- (B) Dilution spotting of five single alanine mutants. As in (A).
- (C) Dilution spotting of ten double alanine mutant combinations. As in (A).
- (D) Top view of *G. stearothermophilus* SmcHd-ATP $\gamma$ S structure (PDB: 5H68) in gray, superimposed with the Rad50Hd-ATP $\gamma$ S-DNA structure (PDB: 5DNY). Only DNA is shown in yellow colors. In blue colours, the five positively-charged residues identified in Figure 3B and 3C are shown. ATP $\gamma$ S is not shown. As in Figure 3D using a different Rad50-ATP $\gamma$ S-DNA co-structure for superimposition. Top view (left panel) and side view (right panel).

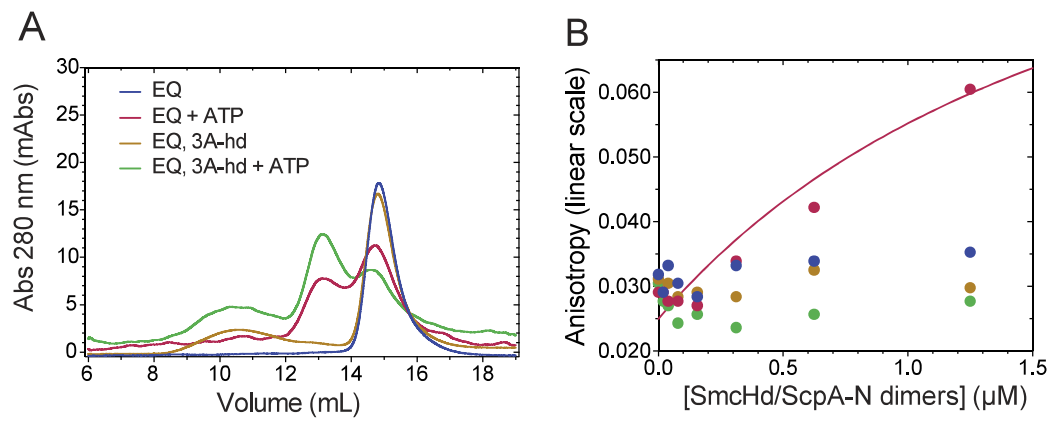

**Figure S4**

**Figure S4, related to Figure 4.**

(A) Chromatogram of SmcHd/ScpA-N elution in a Superdex 200 10/300 size exclusion column. Same experiments as in Figure 4C showing a wider volume range.

(B) DNA binding curves represented by the fluorescence anisotropy (linear scale) for low protein concentrations. Same data as in Figure 4D.



**A**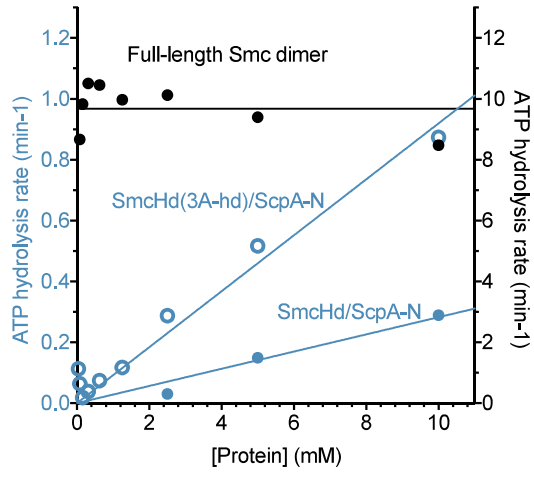**B**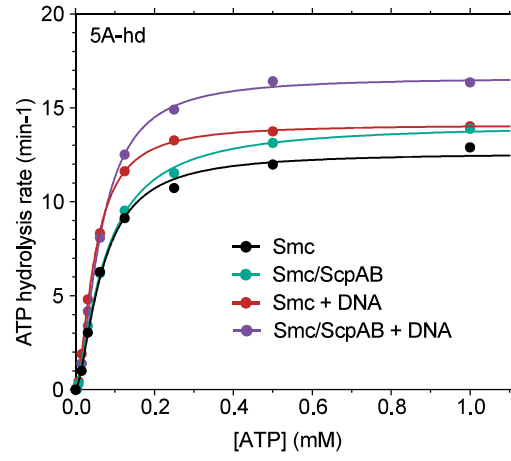**C**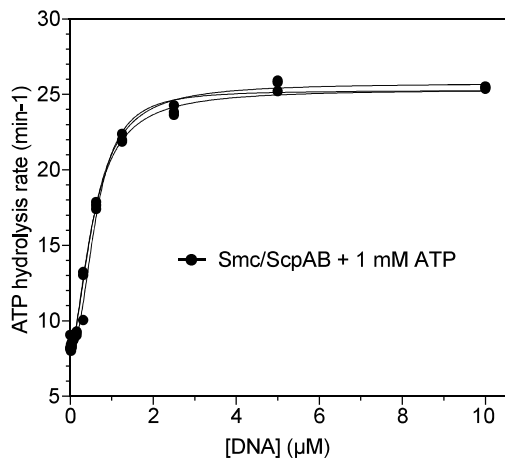**Figure S5**

**Figure S5, related to Figure 5.**

- (A) ATP hydrolysis activity of SmcHd/ScpA-N mutants (axis and data in blue colors) and full-length Smc (axis and data in black colors) at increasing protein concentrations. Data points for the 3A-hd mutant of SmcHd/ScpA-N are shown in open circles. Each rate was divided by the corresponding protein concentration and fit to the first order  $k_{cat}$  equation for full-length Smc dimer, or to the second order  $k_{cat}$  equation for the SmcHd/ScpA-N variants (see STAR\*Methods for details). The  $k_{cat}$  values for full-length Smc, SmcHd/ScpA-N and SmcHd(3A-hd)/ScpA-N are  $9.6 \pm 0.2 \text{ min}^{-1}$ ,  $28.5 \pm 2.5 \text{ mM}^{-1} \text{ min}^{-1}$ , and  $91.9 \pm 4.75 \text{ mM}^{-1} \text{ min}^{-1}$ , respectively.
- (B) ATP hydrolysis rate for full-length Smc(5A-hd) protein. As in Figure 5C.
- (C) DNA titration of wt Smc/ScpAB in the presence of 1 mM ATP. Data points and fits for three experiments are shown.

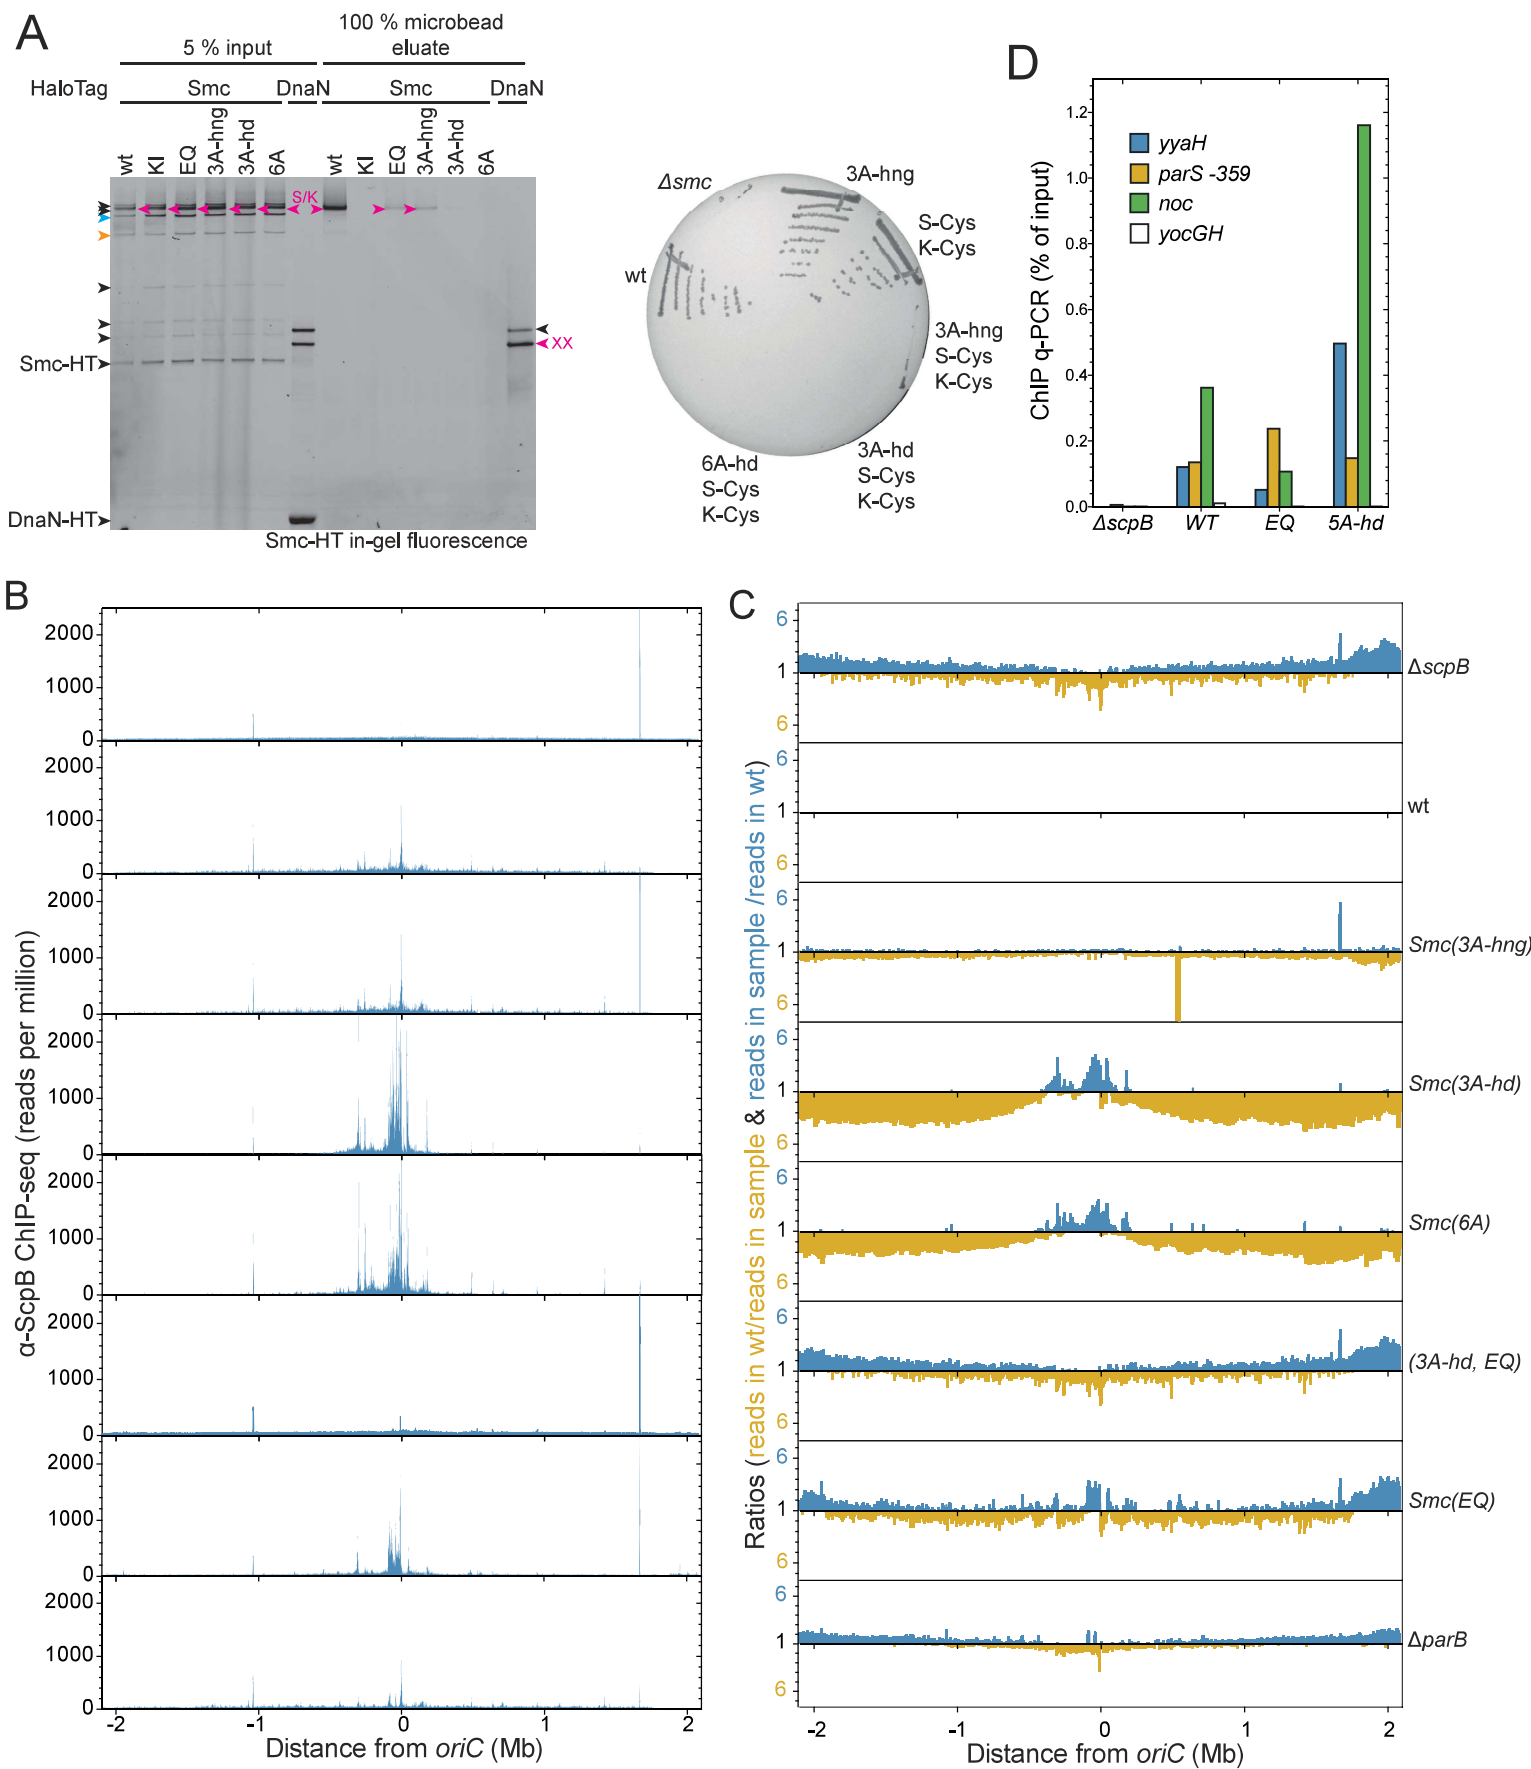

**Figure S6**

**Figure S6, related to Figure 6.**

(A) Chromosome entrapment assay for S/K rings in mutant Smc/ScpAB using agarose microbeads (left panel). As in Figure 6A but including the 3A-hng and 6A mutants. Growth of strains with DNA binding mutations and cross-linking cysteines on nutrient rich medium by single-colony streaking (right panel). Incubation at 37° C for 16 hr.

(A) Chromosome-wide ChIP-seq profiles (in reads per million) for data shown in Figure 6B.

(B) Ratiometric analysis of chromosome-wide profiles shown in (B). Ratios were calculated as described in Figure 6C.

(D)  $\alpha$ -ScpB-ChIP-qPCR. As in Figure 6D for the 5A-hd mutant.

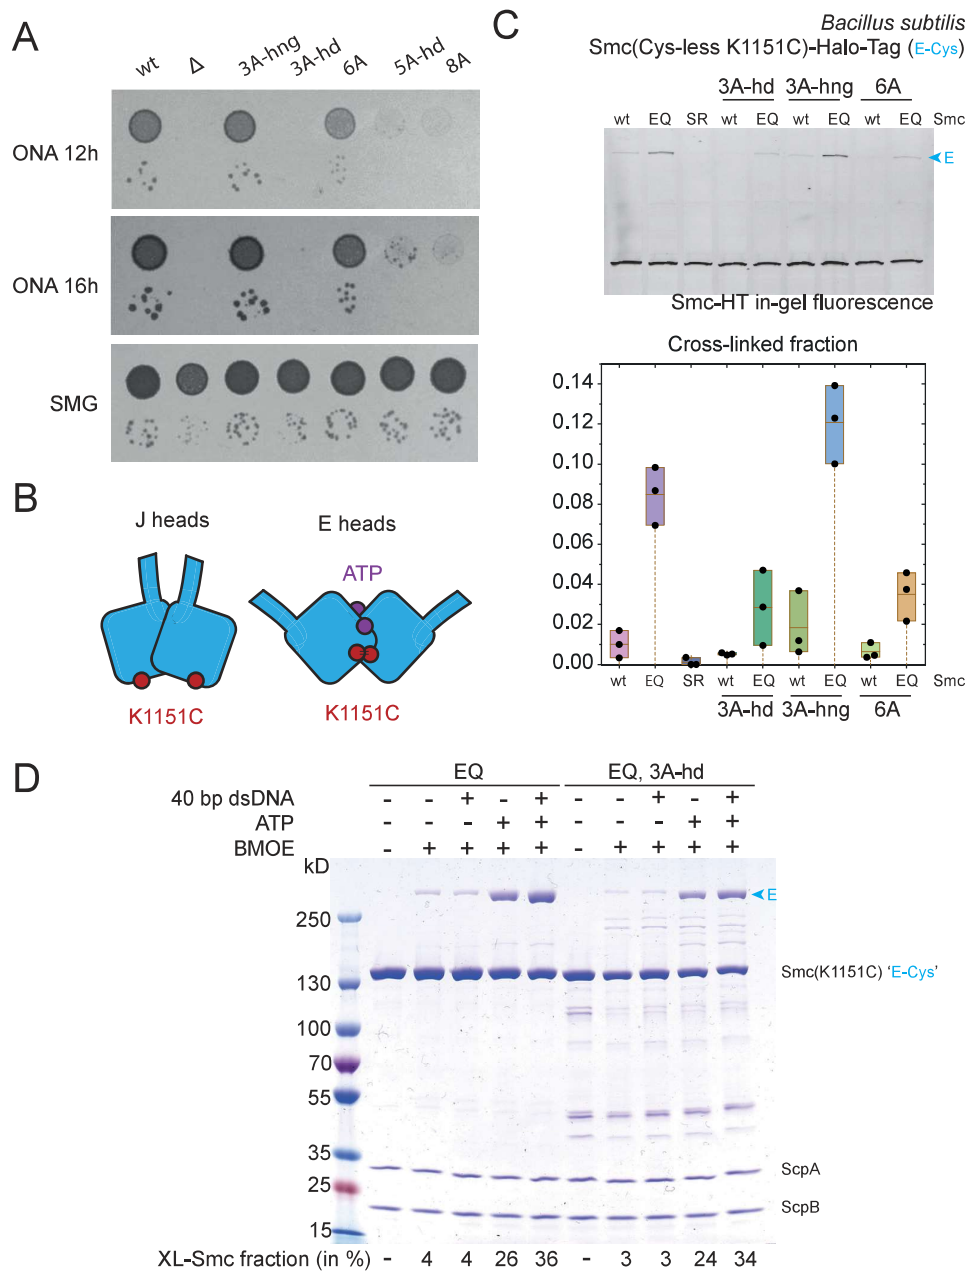

**Figure S7**

**Figure S7, related to Figure 7.**

- (A) Dilution spotting of *smc(6A)* and *smc(5A-hd, 3A-hng)* ('8A') strains. Growth on ONA was monitored after 12 and 16 hr (upper and middle panels). As in Figure 2D.
- (B) Schematic view of K1151C cross-linking in E heads but not J heads Smc/ScpAB.
- (C) Head engagement levels in 3A-hd, 3A-hng and 6A mutants as measured by *in vivo* cross-linking of E-Cys (K1151C). In gel-fluorescence of HaloTag-TMR ligand conjugate is shown in the top panel and the intensity quantification ratio in the bottom panel. Each dot in the graph represents an experimental data point. The boxes span from the lowest to the highest value and the horizontal line denotes the mean from three biological replicates. SR denotes the Signature motif mutation (S1090R), EQ (E1118Q).
- (D) Head engagement levels in EQ and (3A-hd, EQ) mutant Smc/ScpAB as measured by *in vitro* cross-linking of E-Cys. Quantification of cross-linked fractions is given below the gel image. Please note that the purified preparation of Smc(3A-hd, EQ) contains a number of impurities.

## Supplemental tables

**Table S1, related to Figures 1-7.** Strain usage. Genotypes of all strains are given in Table S6.

| <b>Figure</b> | <b>Strains</b>                                                                                                                                 |
|---------------|------------------------------------------------------------------------------------------------------------------------------------------------|
| 1B            | BSG1682, BSG1681, BSG1719, BSG3109, BSG2264, BSG1782, BSG2360, BSG2370                                                                         |
| 1C            | BSG1782, BSG2360, BSG2370, BSG2709, BSG2695                                                                                                    |
| 1D            | BSG1782, BSG2360, BSG2370, BSG2709, BSG2695, BSG1002, BSG1449, BSG1459                                                                         |
| 2D            | BSG1002, BSG1007, BSG1050, BSG1993, BSG2011, BSG1992, BSG2046                                                                                  |
| 3B            | BSG1002, BSG1007, BSG2879, BSG2870, BSG2907, BSG2871, BSG2881, BSG2971, BSG2873, BSG2899, BSG2882, BSG2910                                     |
| 3C            | BSG1002, BSG1007, BSG2873, BSG2903, BSG2909, BSG2911                                                                                           |
| 6A            | BSG1782, BSG1784, BSG1786, BSG3447, BSG1002, BSG1449, BSG1459                                                                                  |
| 6B, C         | BSG1489, BSG1002, BSG1993, BSG2873, BSG3213, BSG1008                                                                                           |
| 6D            | BSG1489, BSG1002, BSG1008, BSG2873                                                                                                             |
| 7A            | BSG1002, BSG1007, BSG1008, BSG1993, BSG2873, BSG3214, BSG3213                                                                                  |
| 7C            | BSG1682, BSG1681, BSG1719, BSG3109, BSG1457, BSG1488, BSG1782, BSG3107                                                                         |
| 7D            | BSG1782, BSG1786, BSG1726, BSG3107, BSG3799, BSG3800, BSG1002, BSG1449, BSG1459                                                                |
| S1A           | BSG1782, BSG1810, BSG2361, BSG2371, BSG2363, BSG2712, BSG2710, BSG2725                                                                         |
| S1C           | BSG1782, BSG1457, BSG3109, BSG3097, BSG3098, BSG1002, BSG1449, BSG1459                                                                         |
| S2B           | BSG1002, BSG1007, BSG1050, BSG1993, BSG2046, BSG1992, BSG2011                                                                                  |
| S3A           | BSG1002, BSG1007, BSG2812, BSG2813, BSG2833, BSG2834, BSG2835, BSG2836, BSG2972, BSG2837, BSG2838                                              |
| S3B           | BSG1002, BSG1007, BSG2868, BSG2880, BSG2874, BSG2876, BSG2904                                                                                  |
| S3C           | BSG1002, BSG1007, BSG2902, BSG2878, BSG2869, BSG2905, BSG2877, BSG2872, BSG2896, BSG2875, BSG2906                                              |
| S6A           | BSG1782, BSG1784, BSG1786, BSG3780, BSG3447, BSG3775, BSG1002, BSG1449, BSG1459, BSG1002, BSG1007, BSG1992, BSG1782, BSG3780, BSG3775, BSG3447 |
| S6B, C        | BSG1489, BSG1002, BSG1993, BSG2873, BSG3213, BSG3214, BSG1008, BSG1050                                                                         |
| S6D           | BSG1489, BSG1002, BSG1007, BSG2911                                                                                                             |
| S7A           | BSG1002, BSG1007, BSG1993, BSG2873, BSG3213, BSG2911, BSG3068                                                                                  |
| S7C           | BSG1457, BSG1488, BSG1600, BSG3599, BSG3600, BSG3618, BSG3619, BSG3616, BSG3617                                                                |





**Table S3, related to Figures 2 and 4.** Fluorescence anisotropy DNA-binding fit values.

| Figure | Construct                                    | $K_d$ ( $\mu\text{M}$ ) | $A_{min}$          | $A_{max}$              | replicates |
|--------|----------------------------------------------|-------------------------|--------------------|------------------------|------------|
| 1D     | SmcH-CC100                                   | $0.16 \pm 0.01$         | $0.034 \pm 0.001$  | $0.21 \pm 0.002$       | 3          |
| 1D     | SmcH-CC100<br>(3A-hng)                       | $5.8 \pm 2.3$           | $0.034 \pm 0.0009$ | $0.10 \pm 0.02$        | 3          |
| 3D     | SmcHd(EQ)/<br>ScpA-N                         | n.d                     | n.d                | n.d                    | 3          |
| 3D     | SmcHd(EQ)/<br>ScpA-N + 1mM<br>ATP            | $1.90 \pm 0.31$         | $0.024 \pm 0.001$  | $0.088 \pm$<br>$0.003$ | 3          |
| 3D     | SmcHd(EQ,<br>3A-hd)/<br>ScpA-N               | n.d                     | n.d                | n.d                    | 3          |
| 3D     | SmcHd(EQ,<br>3A-hd)/<br>ScpA-N + 1 mM<br>ATP | n.d                     | n.d                | n.d                    | 3          |

**Table S4, related to Figure 3 and S3.***parB* deletion in single glutamate *smc* mutants

| Mutant       | Number of clones checked for $\Delta parB$ | Number of positive clones for $\Delta parB$ |
|--------------|--------------------------------------------|---------------------------------------------|
| wt           | 8                                          | 8                                           |
| $\Delta smc$ | 2                                          | 0                                           |
| R17E         | 8                                          | 7                                           |
| R54E         | 16                                         | 0                                           |
| R57E         | 5                                          | 0                                           |
| K60E         | 24                                         | 0                                           |
| R120E        | 24                                         | 1                                           |
| K122E        | 24                                         | 0                                           |
| K153E        | 16                                         | 0                                           |
| K176E        | 8                                          | 8                                           |
| K180E        | 8                                          | 6                                           |

**Table S5, related to Figure 5.** Kinetic parameters of the Smc ATPase.

| Construct                              | $k_{cat}$ ( $\text{min}^{-1}$ ) | $K_{0.5}$ (mM)        | h                | Repli-<br>cates |
|----------------------------------------|---------------------------------|-----------------------|------------------|-----------------|
| SmcHd/ScpA-N (10 $\mu$ M)              | 0.0002 $\pm$<br>0.000009        | 0.20 $\pm$ 0.01       | 1.4 $\pm$ 0.1    | 2               |
| SmcHd(3A-hd)/ScpA-N (10<br>$\mu$ M)    | 0.0009 $\pm$<br>0.00003         | 0.48 $\pm$ 0.03       | 1.12 $\pm$ 0.05  | 2               |
| Smc wt                                 | 10.9 $\pm$ 0.8                  | 0.35 $\pm$ 0.06       | 1.07 $\pm$ 0.086 | 3               |
| Smc wt/ScpAB                           | 6.66 $\pm$ 0.45                 | 0.20 $\pm$ 0.03       | 0.88 $\pm$ 0.07  | 3               |
| Smc wt + 3 $\mu$ M dsDNA               | 14.15 $\pm$ 0.55                | 0.063 $\pm$<br>0.006  | 1.8 $\pm$ 0.2    | 3               |
| Smc wt/ScpAB + 3 $\mu$ M dsDNA         | 24.12 $\pm$ 0.84                | 0.112 $\pm$<br>0.008  | 1.92 $\pm$ 0.22  | 3               |
| Smc(R57A)                              | 4.76 $\pm$ 0.86                 | 0.51 $\pm$ 0.22       | 0.89 $\pm$ 0.11  | 2               |
| Smc(R57A)/ScpAB                        | 6.34 $\pm$ 0.3                  | 0.32 $\pm$ 0.03       | 0.94 $\pm$ 0.04  | 2               |
| Smc(R57A) + 3 $\mu$ M DNA              | 4.85 $\pm$ 0.55                 | 0.43 $\pm$ 0.1        | 1.08 $\pm$ 0.1   | 2               |
| Smc(R57A)/ScpAB + 3 $\mu$ M<br>DNA     | 10.6 $\pm$ 0.72                 | 0.45 $\pm$ 0.07       | 0.93 $\pm$ 0.04  | 2               |
| Smc(3A-hd)                             | 10.1 $\pm$ 0.2                  | 0.051 $\pm$<br>0.003  | 1.3 $\pm$ 0.1    | 3               |
| Smc(3A-hd)/ScpAB                       | 9.9 $\pm$ 0.1                   | 0.065 $\pm$<br>0.001  | 1.41 $\pm$ 0.04  | 3               |
| Smc(3A-hd) + 3 $\mu$ M dsDNA           | 10.8 $\pm$ 0.1                  | 0.034 $\pm$<br>0.001  | 1.68 $\pm$ 0.09  | 3               |
| Smc(3A-hd)/ScpAB + 3 $\mu$ M<br>dsDNA  | 17.2 $\pm$ 0.3                  | 0.037 $\pm$<br>0.002  | 1.82 $\pm$ 0.16  | 3               |
| Smc(3A-hng)                            | 18.5 $\pm$ 3.6                  | 0.87 $\pm$ 0.38       | 0.86 $\pm$ 0.08  | 3               |
| Smc(3A-hng)/ScpAB                      | 121.7 $\pm$ 13.0                | 1.06 $\pm$ 0.19       | 1.1 $\pm$ 0.05   | 3               |
| Smc(3A-hng) + 3 $\mu$ M dsDNA          | 14.6 $\pm$ 0.4                  | 0.17 $\pm$ 0.01       | 1.28 $\pm$ 0.07  | 3               |
| Smc(3A-hng)/ScpAB + 3 $\mu$ M<br>dsDNA | 82.2 $\pm$ 2.2                  | 0.47 $\pm$ 0.02       | 1.33 $\pm$ 0.03  | 3               |
| Smc(6A)                                | 10.7 $\pm$ 0.6                  | 0.18 $\pm$ 0.02       | 1.14 $\pm$ 0.09  | 2               |
| Smc(6A)/ScpAB                          | 43.04 $\pm$ 0.46                | 0.151 $\pm$<br>0.003  | 1.68 $\pm$ 0.04  | 2               |
| Smc(6A) + 3 $\mu$ M dsDNA              | 10.07 $\pm$ 0.43                | 0.17 $\pm$ 0.01       | 1.17 $\pm$ 0.08  | 2               |
| Smc(6A)/ScpAB + 3 $\mu$ M<br>dsDNA     | 43.3 $\pm$ 0.4                  | 0.146 $\pm$<br>0.003  | 1.72 $\pm$ 0.05  | 2               |
| Smc(5A-hd)                             | 12.6 $\pm$ 0.3                  | 0.066 $\pm$<br>0.005  | 1.5 $\pm$ 0.1    | 2               |
| Smc(5A-hd)/ScpAB                       | 14.4 $\pm$ 0.2                  | 0.075 $\pm$<br>0.003  | 1.36 $\pm$ 0.05  | 2               |
| Smc(5A-hd) + 3 $\mu$ M dsDNA           | 14.1 $\pm$ 0.1                  | 0.048 $\pm$<br>0.0009 | 1.63 $\pm$ 0.04  | 2               |
| Smc(5A-hd)/ScpAB + 3 $\mu$ M<br>dsDNA  | 16.6 $\pm$ 0.2                  | 0.063 $\pm$<br>0.002  | 1.67 $\pm$ 0.09  | 2               |
